# Supplementary material for: Polypyrrole-assisted synthesis of roselike MoS2/nitrogen-containing carbon/graphene hybrids and their robust lithium storage performances
Source: Royal Society of Chemistry journal article supplement (doi:10.1039/c5ra09092j), 2015-01-01
Supplement: c5ra09092j1.pdf [file c5ra09092j1.pdf]

**Electronic Supplementary Information (ESI) for**

Polypyrrole-assisted synthesis of roselike MoS<sub>2</sub>/nitrogen-containing carbon/graphene hybrids and their robust lithium storage performances

Zhiyan Guo,\* Yang Zhong, Zongwei Xuan, Changming Mao, Fanglin Du and Guicun Li\*

College of Materials Science and Engineering, Qingdao University of Science and Technology, Qingdao 266042, China.

\*Corresponding authors. Tel.: 86-532-84022814; fax: 86-532-84022814. E-mail: [zhiyanguo@qust.edu.cn](mailto:zhiyanguo@qust.edu.cn) and [guicunli@qust.edu.cn](mailto:guicunli@qust.edu.cn)

**This PDF file includes:**

**Fig. S1 to S6**

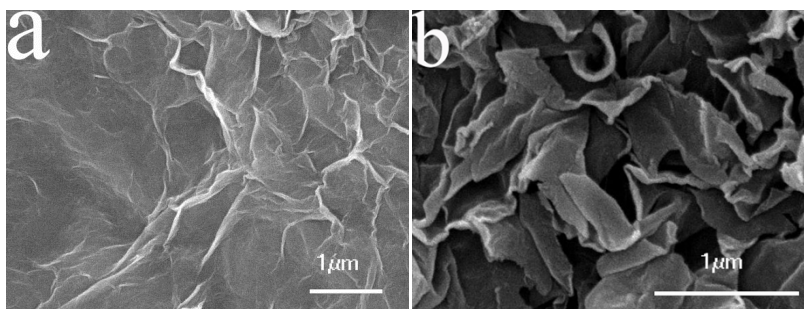

Fig. S1 SEM images of GO (a) and PPy/GO (b).

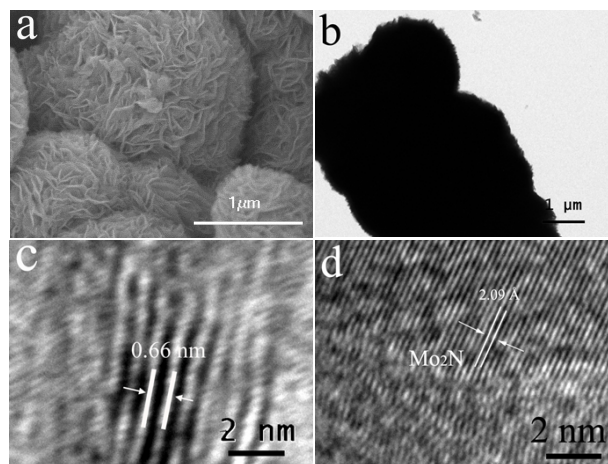

Fig. S2 SEM image (a), TEM image (b), HRTEM image (c) of bare MoS<sub>2</sub> nanosheets, and HRTEM image of Mo<sub>2</sub>N in the MoS<sub>2</sub>/NC/G hybrids (d).

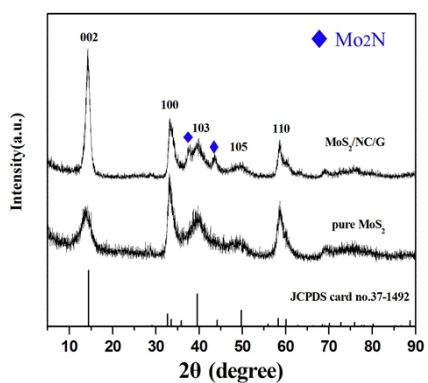

Fig. S3 XRD patterns of the MoS<sub>2</sub>/NC/G hybrids and the bare MoS<sub>2</sub> nanosheets.

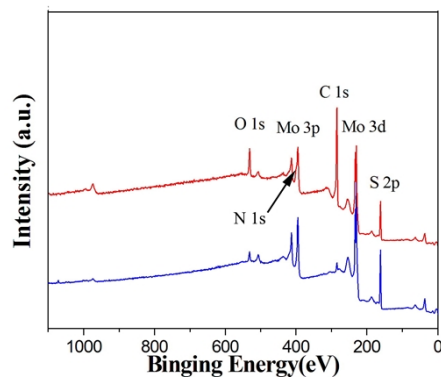

Fig. S4 XPS survey spectra of the MoS<sub>2</sub>/NC/G hybrids and the bare MoS<sub>2</sub> nanosheets.

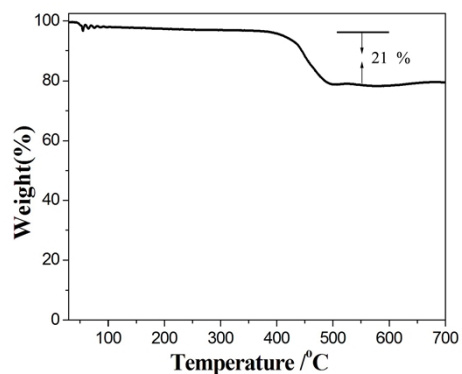

Fig. S5 TG curve of the MoS<sub>2</sub>/NC/G hybrids at a heating rate of 10 °C min<sup>-1</sup> in air.

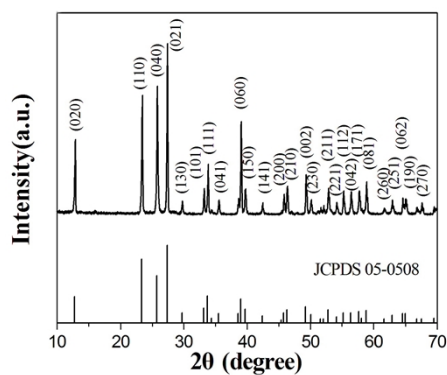

Fig. S6 XRD pattern of the MoS<sub>2</sub>/NC/G hybrids after calcination at 600 °C for 4 h in air.

The XRD pattern of the MoS<sub>2</sub>/NC/G hybrids after calcination at 600 °C for 4 h in air is shown in Figure S6, it is clear that all the identified diffraction peaks of the sample MoS<sub>2</sub>/NC/G hybrids after calcination at 600 °C samples can be clearly assigned to the phase-pure MoO<sub>3</sub> (JCPDS card no. 05-0508).
